# Supplementary material for: Precise genome modification in the crop species Zea mays using zinc-finger nucleases
Source: Springer Nature journal article supplement (doi:10.1038/nature07992), 2009-04-29
Supplement: 41586_2009_BFnature07992_MOESM264_ESM.pdf [file 41586_2009_BFnature07992_MOESM264_ESM.pdf]

## SUPPLEMENTARY INFORMATION

a

*ZmIPK1*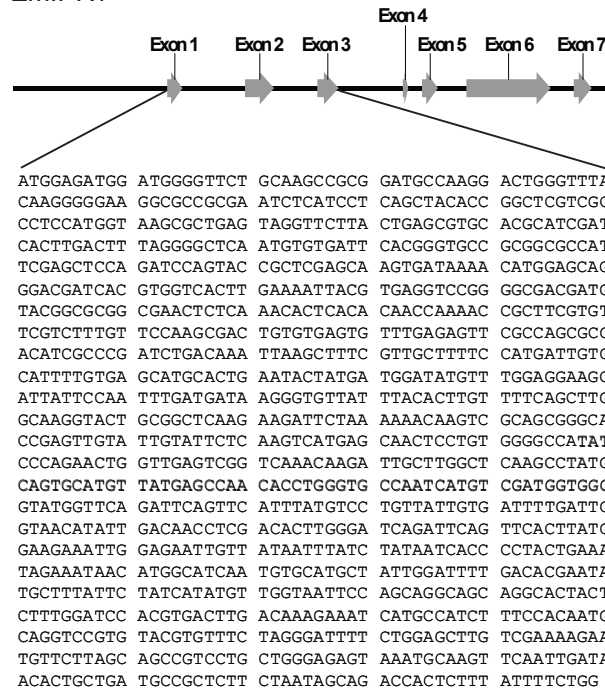

b

|               |                                                                                      |
|---------------|--------------------------------------------------------------------------------------|
| <i>ZmIPK2</i> | ATGGAGATGA ATGGGGTTCT GCAAGCCGCG GATGCCAAGT ACTGGGTTTA CAAGGGTCTA                    |
| <i>ZmIPK1</i> | ATGGAGATGG ATGGGGTTCT GCAAGCCGCG GATGCCAAGG ACTGGGTTTA CAAGGGGAA<br>E1 → E2          |
| <i>ZmIPK2</i> | GGCGCCGCGA ATCTCATCCT CAGCTACACC GGCTCGTCGC CCTCCATGC TTGGCAAGGT                     |
| <i>ZmIPK1</i> | GGCGCCGCGA ATCTCATCCT CAGCTACACC GGCTCGTCGC CCTCCATGC TTGGCAAGGT                     |
| <i>ZmIPK2</i> | ATTGCGGCTC AAGAAGCTTC TAAATGACCA GTCACAGCTG GCACCAAGTT GTATGGTCTT                    |
| <i>ZmIPK1</i> | ACTGCGGCTC AAGAAGCTTC TAAAATACAA GTCACAGCTG GCACCAAGTT GTATGGTCTT<br>ZFN 8-12 R      |
| <i>ZmIPK2</i> | CTCAAGTCAT GAGCAACTCC TGTGGGGCCA TATCCAGAA CTGGTTGAGT CTGTCAACA                      |
| <i>ZmIPK1</i> | CTCAAGTCAT GAGCAACTCC TGTGGGGCCA TATCCAGAA CTGGTTGAGT CGGTCAACA<br>ZFN 8-12 L        |
| <i>ZmIPK2</i> | TGTGGGGCCA TATCCAGAA CTGGTTGAGT CTGTCAACA AGATTGCTTG GCTCAAGCCT                      |
| <i>ZmIPK1</i> | TGTGGGGCCA TATCCAGAA CTGGTTGAGT CTGTCAACA AGATTGCTTG GCTCAAGCCT<br>ZFN 15-16 R*      |
| <i>ZmIPK2</i> | ATGCGTACA TGTTATGAGC CAACACTGG GTGCCAATCA TGTGATGGT GGGTTCATG                        |
| <i>ZmIPK1</i> | ATGCGTACA TGTTATGAGC CAACACTGG GTGCCAATCA TGTGATGGT GGGTTCATG<br>ZFN 15-16 L E2 → E3 |
| <i>ZmIPK2</i> | TACGTGTTTC TAGGGATTTT CTGGAGCTTG TCGAA                                               |
| <i>ZmIPK1</i> | TACGTGTTTC TAGGGATTTT CTGGAGCTTG TCGAAAAGAA                                          |

\* The binding site overlaps with the exon-intron boundary; it is partially represented in the context of the CDS.

c

## Exon 2-1

|             | ZFN 8-12 L                               | ZFN 8-12 R |
|-------------|------------------------------------------|------------|
| <i>lpk1</i> | TCCTGTGGGGCCATATCCAGAACTGGTTGAGTCTGGTCAA |            |
| <i>lpk2</i> | TCCTGTGGGGCCATATCCAGAACTGGTTGAGTCTGGTCAA |            |

## Exon 2-2

|             | ZFN 15-16 L                                   | ZFN 15-16 R |
|-------------|-----------------------------------------------|-------------|
| <i>lpk1</i> | GCCAACAACCTGGGTGCCAATCATGTCTGATGGTGGGGTATGGTT |             |
| <i>lpk2</i> | GCCAACAACCTGGGTGCCAATCATGTCTGATGGTGGGGTATGGTT |             |

**Supplementary Figure 1. The *ZmIPK1* Sequence From Hill Reveals Polymorphisms Relative to *the ZmIPK2* Paralog.**

**S1A.** Genomic structure of *ZmIPK1* from maize variety Hill (top) and nucleotide sequence spanning exons 1-3 (zoom view, bottom). The indicated sequence was used as input template for ZFN design. **S1B.** Sequence comparison of the coding regions in exons 1-3 from *ZmIPK2* (top line) and *ZmIPK1* (bottom line) in Hill. Polymorphic nucleotides such as those exploited for differential ZFN binding site design are shaded in gray. Exon/exon boundaries are indicated. The boxed sequences indicate binding sites for ZFNs used in this study. **S1C.** ZFN target sequences within *ZmIPK1* and *ZmIPK2*. The complete sequences of the ZFN binding sites are underlined and differential SNPs are shaded in gray.

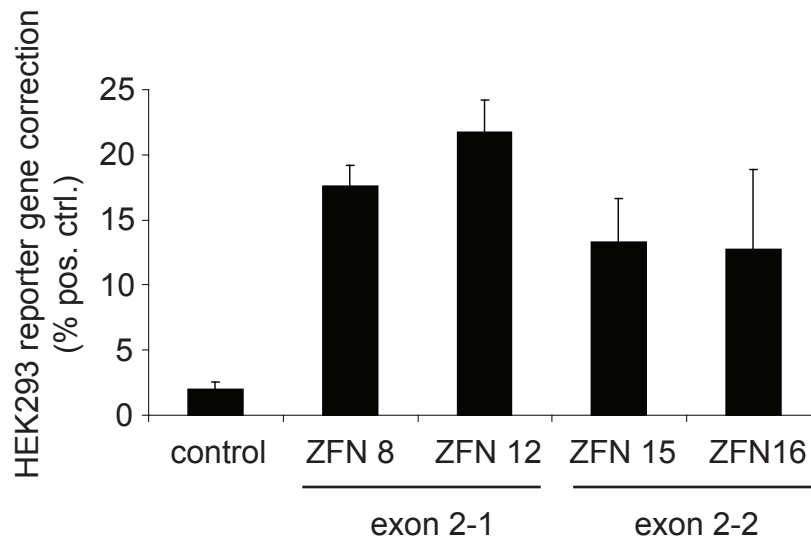

**Supplementary Figure 2. ZFNs designed to target *ZmIPK1* induce DSBs in an integrated chromosomal reporter.**

Representative results of ZFN reporter gene correction activity performed in two distinct HEK293 reporter lines. ZFNs were tested for efficiency of chromosomal reporter gene correction using HEK293 reporter lines, constructed as described (Porteus Science 2003), each engineered to carry a short fragment of the *IPK1* gene. Reporter constructs included a minor modification: the GFP reporter gene was disabled with the recognition site not only of the ZFNs targeting *IPK1*, but also ZFNs that target the *CCR5* gene (Perez Nat. Biotechnol. 2008), to allow normalization of reporter gene correction activity across different lines. The same ranking was observed in three independent experiments. Each datapoint represents the reporter gene correction activity of the indicated ZFNs, normalized to activity exhibited in the same reporter line by control ZFNs. The data are presented as “percent gene correction activity” of control ZFNs.

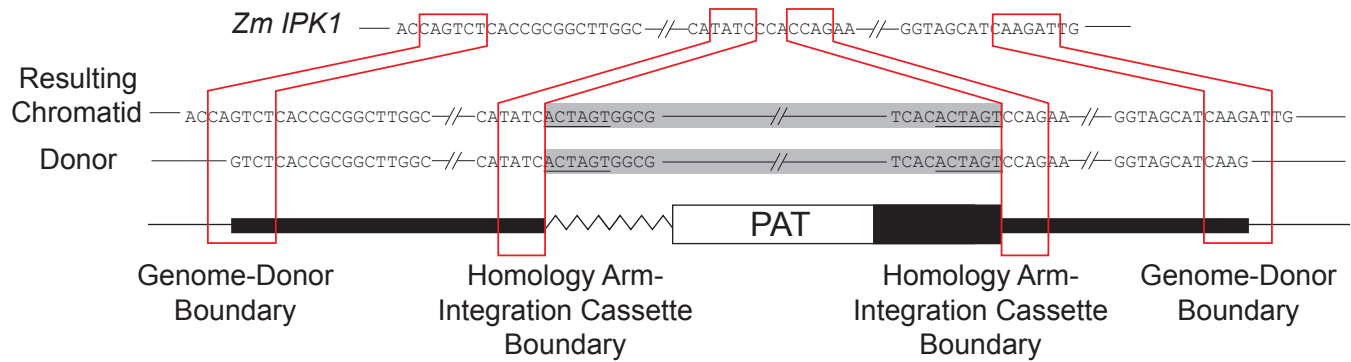

**Supplementary Figure 3. Consensus sequence of target locus analysis of *ZmIPK1* PCR-genotyping amplicons.** High fidelity integration of the non-autonomous PAT donor was diagnosed based on integrity of the indicated genome/donor boundary sequences, homology arm integration cassette boundaries, preservation of diagnostic sequences in the donor molecule (*SpeI* site, underlined), and PAT gene cassette components.

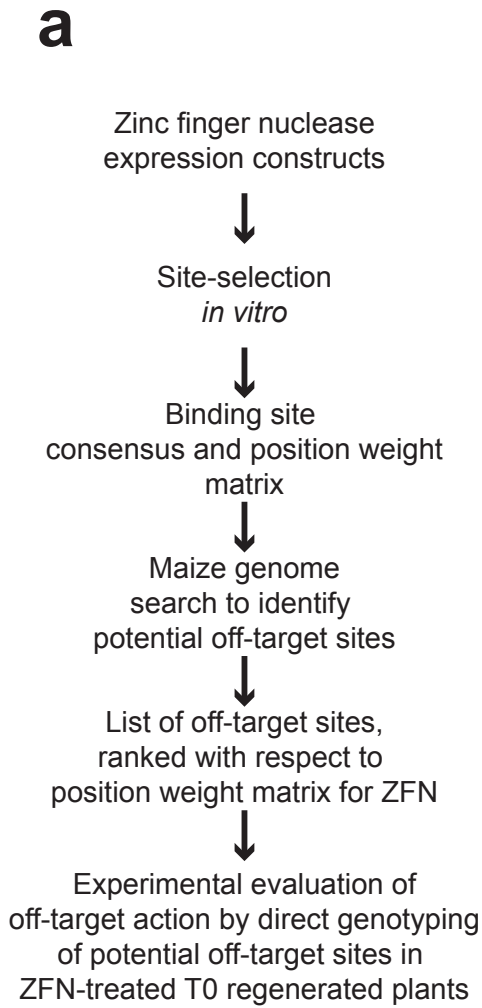**b**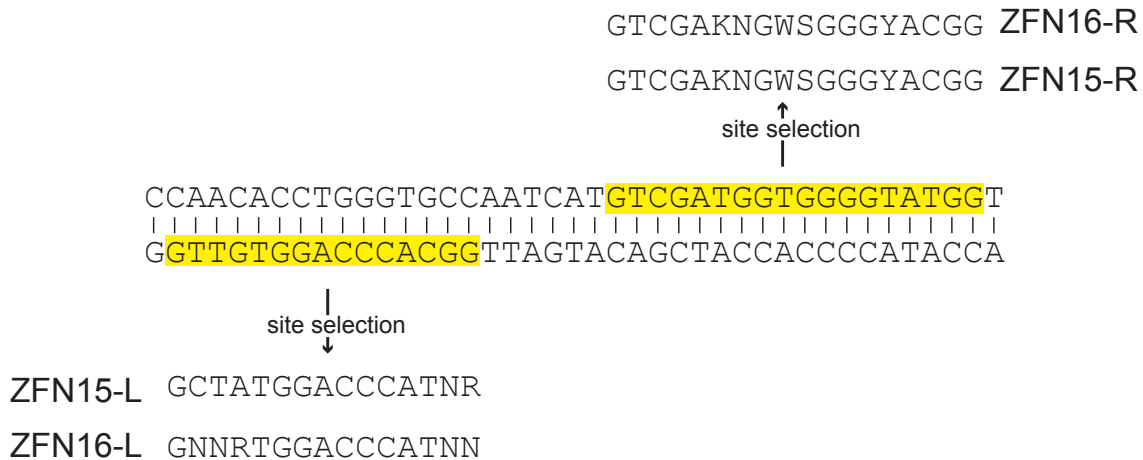**c**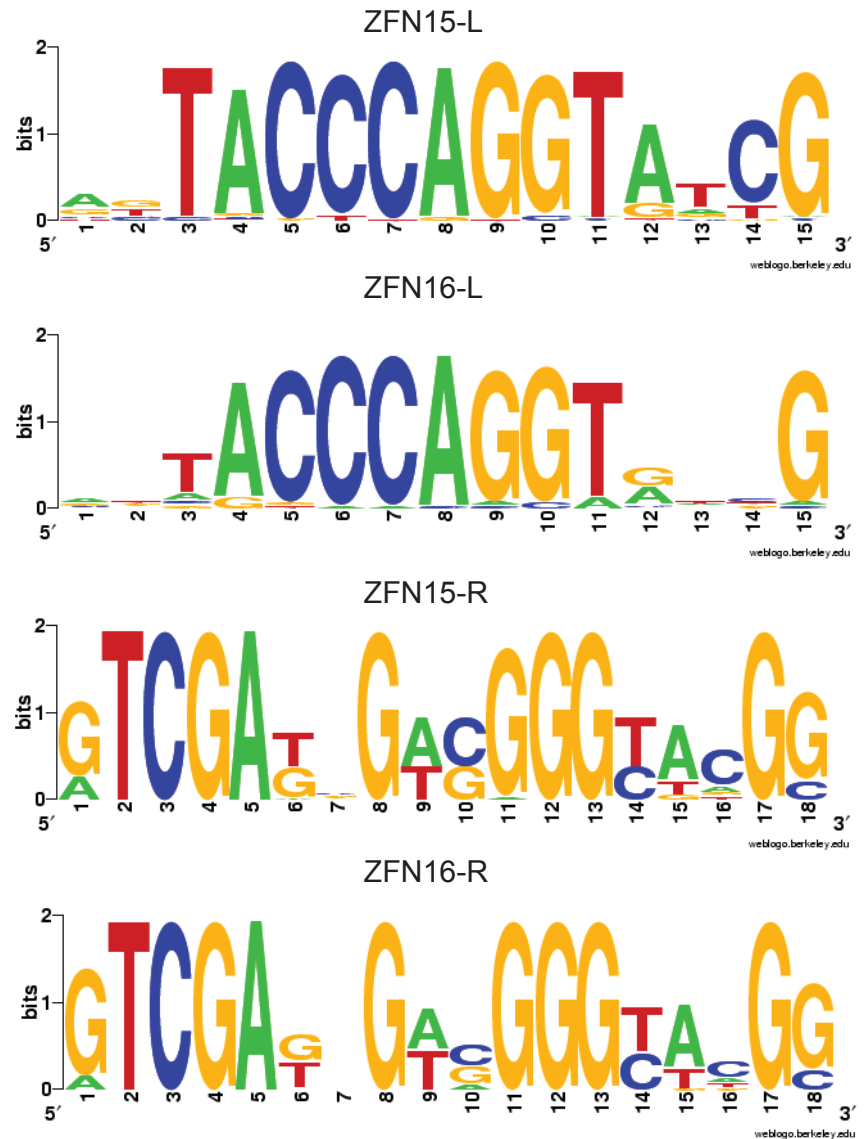

d

| ZFN15-L         | ZFN16-L          | ZFN15-R            | ZFN-16-R            |
|-----------------|------------------|--------------------|---------------------|
| ACTACCCAGGTATCG | ATTGCCCCAGGTGGGG | GTCGAGCGACGGGTAAGG | GTCGAGAGACGGGCACGG  |
| ATTACCCAGGTGCTG | GTTACCCAGGTGCTG  | GTCGATAGACGGGTGCGG | GTCGAGCGACGGGCATGC  |
| GGTACCCAGGTATCG | AATGCCCCAGGACGGG | GTCGAGGGACGGGCACGC | GTCGAGCGACGGGTTAGG  |
| GGTACCCAGGTATCG | TATGCCCCAGGTGACG | ATCGATAGTGGGGCACGG | GTCGAGTGTAGGGTTAGG  |
| AGTACCCAGGTATCG | TCTACCCAGGTAGAG  | ATCGATGGTGGGGCACGG | GTCGAGTGTGGGGTTAGG  |
| ACTACCCAGGTATTG | GTTACCCAGGTACTG  | GTCGAGCGACGGGCACGC | GTCGATAGTGGGGCACGG  |
| ATTACCCAGGTAACG | CCGACCCAGGTACTG  | GTCGAGCGACGGGCACGG | GTCGATAGTGGGGCATGC  |
| CTTTCTCAGCTGACC | GGTACAAACCTTAAC  | GTCGAGCGACGGGTATGG | GTCGATAGTGGGGCATGG  |
| ACTACCCAGGTATCG | ATTACCCAGGTATCG  | GTCGAGCGACGGGTGCGG | GTCGATGGACGGGCACGC  |
| ATTACCCAGGTAGCG | ATAACCCAGGTGACG  | GTCGAGCGTGGGGTAAGG | GTCGATGGACGGGTAGGG  |
| GATACCCAGGTATTG | GGTACCCAGGTGTTG  | GTCGAGCGTGGGGTTCGG | ATCGAGCGACGGGCTCGG  |
| ATTACCCAGGTATCG | ATTACCCAGGTATCG  | GTCGAGTGCAGGGTTGGG | GTCGACCGACGGGCACGG  |
| GCTACCCAGGTATCG | GTGAGCCCAGTCAAG  | GTCGAGTGTGGGGTACGG | GTCGAGAGACGGGTTAGG  |
| GGTACCCAGGAGGTG | AGTACCCAGGTATCG  | GTCGATAGTGGGGCAGGG | GTCGAGAGACGGGTTCCGG |
| CGTACCCAGGTGGCG | AAAACCCAGGTATGG  | GTCGATAGTGGGGTTAGG | GTCGAGCGTGGGGTAGGG  |
| ACTACCCAGGTATCG | ACTACCCAGGAGGAG  | GTCGATCGTGGGGCACGG | GTCGAGTGAAGGGCACGG  |
| CGTGCCCGTCTATCG | GGTACCCAGGTGTCA  | GTCGATCGTGGGGCACGG | GTCGAGTGTAGGGCATCGG |
| CTTGTCAGCTTTTA  | GGAGCCCAGGTGCCG  | GTCGATCGTGGGGTATGG | GTCGATAGTGGGGCACGC  |
| TGTACCCAGGTATCG | ATTACCCAGGTATCG  | GTCGATGGACAGGTATGG | GTCGATAGTGGGGCATGG  |
| ATTACCCAGGTAGCG | CTTACCCAGGTATGG  | GTCGATGGACGGGTTAGG | GTCGATAGTGGGGTAAGG  |
| ATTACCCAGGTGCTG | GGTACCCAGGTGCCG  | ATCGAGTGCAGGGTAGGG | GTCGATAGTGGGGTATGG  |
| GTTACCCAGGTATCG | CGTACCCAGGTAACG  | ATCGATAGTGGGGTACCG | GTCGATGGAAGGGTACGG  |
| ACTACCCAGGTAGCG | ACGACCCAGGTGTCG  | ATCGATGGACGGGCACGC | GTCGATGGACGGGCATGC  |
| GCTACCCAGGTATCG | CCTACCCAGGTGCCG  | ATCGATGGACGGGCACGC | GTCGATGGACGGGTTAGG  |
| CGTACCCAGGTATCG | CATACCCAGGTGACG  | ATCGATGGACGGGCACGC | GTCGATGGTGGGGCACGG  |
| TCTACCCAGGTATCG | GGTACCCAGGTAGTG  | ATCGATGGACGGGTACGG | GTCGATGGTGGGGTAAGG  |
| ACTACCCAGGTATCG | ATTACCCAGGTATTG  | ATCGATGGACGGGTTCGG | ATCGAGAGTGGGGTACGG  |
| AGTACCCAGGTATCG | GTTACCCAGGTGATG  | GTCGAGCGACGGGCACGG | ATCGAGCGACGGGTACGG  |
| AGTACCCAGGTATCG | ACTACCCAGGTGTCG  | GTCGAGAGTGGGGTACGG | ATCGAGCGACGGGTTCGG  |
| GGTACCCAGGTATCG | ATTACCCAGGTATCG  | GTCGAGCGACGGGCACGG | ATCGATAGTGGGGTACGC  |
| ATTACCCAGGTATCG | GGCATCCAGGTAGTG  | GTCGAGCGACGGGTTCGG | GTCGAAAGTGGGGCACGG  |
| GTTACCCAGGTATCG | TTCACCCAGGAGTAG  | GTCGAGCGTGGGGCACGG | GTCGAGCGACGGGCACGC  |
| AGTACCCAGGTATGG | ATTACCCAGGTGTGG  | GTCGAGGGACGGGTAGG  | GTCGAGCGACGGGCACGG  |
| AATACCCAGGTAGCG | CGTACCCAGGTATCG  | GTCGAGTGCAGGGTACGC | GTCGAGCGACGGGTTCCGG |
| AGTACCCAGGTATCG | AACACCCAGCACCCG  | GTCGATAGTGGGGTACGG | GTCGAGTGCAGGGTTAGG  |
| GGTACCCAGGTGTGG | TTAACCCAGGTGATG  | GTCGATGGACGGGTACGG | GTCGAGTGTGGGGCACGC  |
| ATTACCCAGGTAGCG | ATTACCCAGGTATGG  | GTCGATGGACGGGTACGG | GTCGAGTGTGGGGTACGG  |
| TCTACCCAGGTAACG | GGAACCCAGGTGTGG  | GTCGATGGTGGGGCACGG | GTCGATAGACGGGTACGG  |
| ACTACCCAGGTAACG | AGTACCCAGGTATCG  |                    | GTCGATAGACGGGTTCCGG |
| TTTACCCAGGTATCG |                  |                    | GTCGATAGTAGGGCACGG  |
| AGTACCCAGGTATCG |                  |                    | GTCGATGGTGGGGTAGGG  |
| ATTACCCAGGTAGCG |                  |                    |                     |
| ACTACCCAGGTAACG |                  |                    |                     |
| ACCACCTGGGCTCCG |                  |                    |                     |
| ATTACCCAGGTATCG |                  |                    |                     |
| GGTACCCAGGTATCG |                  |                    |                     |
| ATTACCCAGGTATCG |                  |                    |                     |
| TGTACCCAGGTATCG |                  |                    |                     |
| CTTACCCAGGTATCG |                  |                    |                     |
| GCTACCCAGGTGCTG |                  |                    |                     |
| GGTACCCAGGTATCG |                  |                    |                     |
| GGTACCCAGGTATCG |                  |                    |                     |
| GGTACCCAGGTAACG |                  |                    |                     |
| ATTACCCAGGTATCG |                  |                    |                     |
| ATTACCCAGGTATCG |                  |                    |                     |
| GCTACCCAGGTGTCG |                  |                    |                     |
| ATTACCCAGGTATCG |                  |                    |                     |
| TTTACCCAGGTAGTG |                  |                    |                     |
| AGTACCCAGGTAACG |                  |                    |                     |
| ATTACCCAGGTAACG |                  |                    |                     |
| AGTACCCAGGTAACG |                  |                    |                     |
| GGCCCTCAGGTGCTG |                  |                    |                     |
| ATTACCCAGGTATCG |                  |                    |                     |

### Supplementary Figure 4. Analysis of ZFN 15 and 16 action at potential off-target sites.

**S4A.** Experimental scheme to evaluate ZFN action at potential off-target sites.

**S4B.** Illustration showing the ZFN 15-16 recognition sites in the *IPK1* gene (shaded), and a qualitative representation of *in vitro* SELEX results yielding the ZFN recognition sites determined experimentally. **S4C.** Summary of ZFN site selection experiments depicted via standard logograms (<http://weblogo.berkeley.edu/logo.cgi>).

**S4D.** Sequences obtained from the SELEX experiment used to generate the logograms.

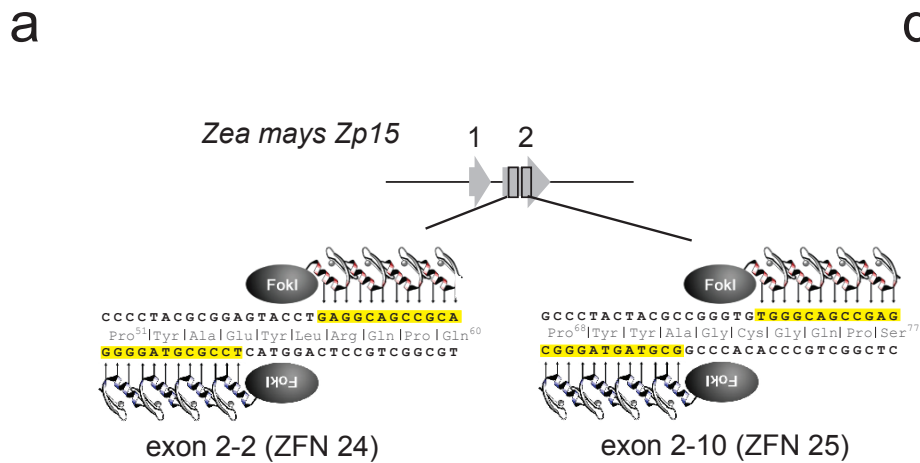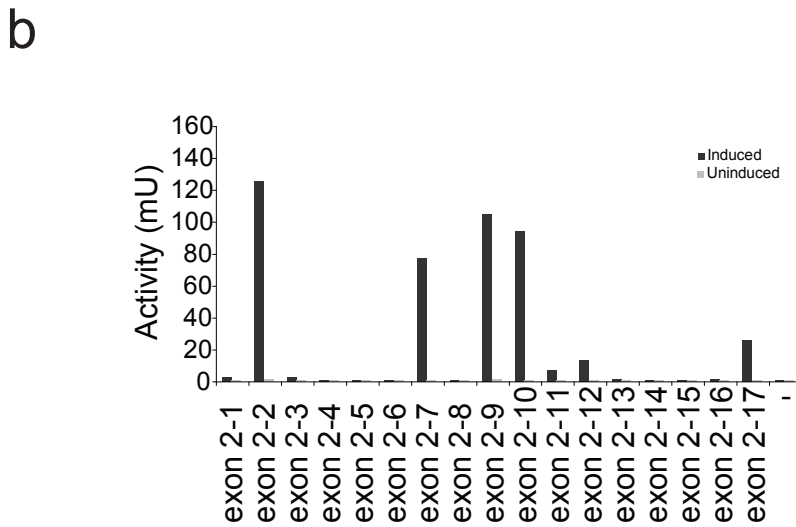

**c**

**ZFN 24**

ACCCCTACGCGGAGTACCTGAGGCAGCCGCAG (wt)

ACCCCTACGCGGAG :: CTGAGGCAGCCGCAG ( $\Delta 3$ )

**ZFN 25**

CGCCCTACTACGCCG :: GGTGTGGGCAGCCGAGC (wt)

CGCCCTACTACGCCG**GCAATT**GGTGTGGGCAGCCGAGC (+6)

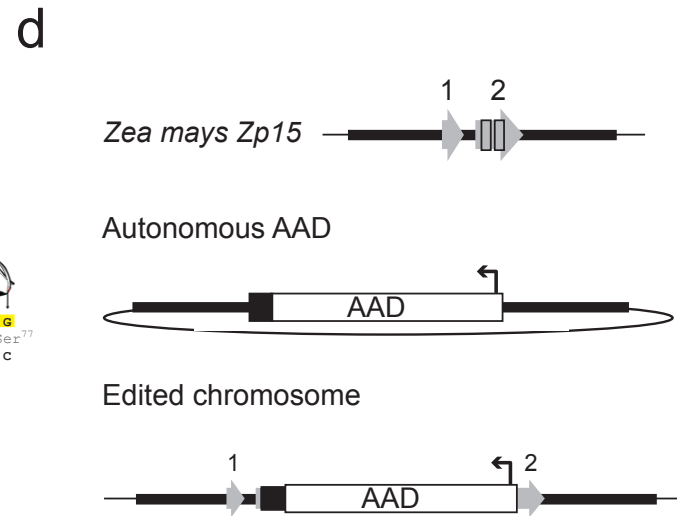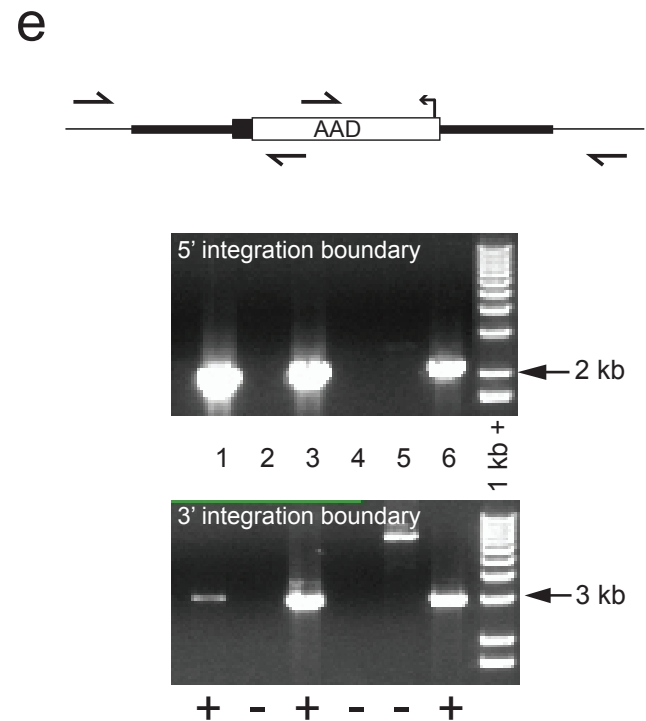

**Supplementary Figure 5. Homology-directed repair of a ZFN-induced DSB results in targeted gene addition to the *Zp15* gene. S5A.** Schematic representation of the *ZmZp15* gene, with exons indicated as arrows. Gene segments used as templates for ZFN design are indicated by boxes. The zoom-in view illustrates the binding site for two ZFN pairs (Smith NAR 2000) designed to induce DSBs at 2 distinct positions.

**S5B.** Results of normalized ZFN reporter gene correction activity in a budding yeast proxy screening system, constructed as described (Doyon Nat biotechnol 2008). **S5C.** Identification of representative deletions (ZFN 24, top) and insertions (ZFN 25, bottom) relative to wild-type at the endogenous *Zp15* locus. Modifications induced by NHEJ occur at the predicted ZFN cleavage sites delimited by the ZFN binding sites (underlined). **S5D.** *Zp15* donor design. Top, schematic of the *ZP15* gene region targeted by ZFNs. Middle, schematic of the *Zp15* donor construct comprised of an autonomous or AAD gene cassette flanked by short segments of *Zp15* sequence identity shown as thick black lines. The AAD gene cassette included a promoter from the rice actin gene (OsAct) and terminator from the maize lipase gene (black box). Bottom, integration of the donor at the intended site is expected to yield an edited chromatid with a disrupted *Zp15* gene. **S5E.** Representative results of PCR-based genotyping of the *Zp15* locus. Primers hybridizing to *Zp15* gene sequences not contained on donor constructs and the AAD1 transgene coding region, spanning the predicted integration boundaries (schematic, top) were used to amplify gDNA from all herbicide tolerant calli. Gel, top: 5'-integration boundary. Gel, bottom: 3'-integration boundary. The presence of appropriately sized bands (5'-boundary, 2 kb; 3'-boundary, 3 kb; arrows left) indicates integration of AAD into *Zp15* (lanes marked as +). Lanes 1-6, *Zp15* events 1-6, 1-7, 148, 149, 151, 155.



Supplementary Table 1. Amino Acid Sequences of *ZmIPK1* Zinc-Finger Binding Domains

| ZFN # | ZFN Target Position | ZF Domain Left*                                                                                                                                                                        | ZF Domain Right*                                                                                                                                                                                                                    |
|-------|---------------------|----------------------------------------------------------------------------------------------------------------------------------------------------------------------------------------|-------------------------------------------------------------------------------------------------------------------------------------------------------------------------------------------------------------------------------------|
| 8     | exon 2-1            | AAMAERPFQCRICMRNFSRSDHLS <u>EHIR</u> THTGEK<br>PFACDICGRKFAQSATRKKHTKIHTGSQKPFQCRICMRNFSERGT <u>LARHIR</u> THTGEKPFACDICGRKFA<br>RSDALTQHAQRCGGLR                                      | AAMAERPFQCRICMRNFSDRSALS <u>RHIR</u> THTGEK<br>PFACDICGRKFARNDDRKKHTKIHTGGQRPFQCRICMRNFSRSDN <u>LARHIR</u> THTGEKPFACDICGRKFA<br>TSGSLTRHTKIHTGSQKPFQCRICMRNFSRSDVLS<br>EHIR <u>THTGEK</u> PFACDICGRKFAQSGN <u>LARHAQRC</u><br>GGLR |
| 12    | exon 2-1            | AAMAERPFQCRICMRNFSRSDHLS <u>EHIR</u> THTGEK<br>PFACDICGRKFAQSATRKKHTKIHTGSQKPFQCRICMRNFSERGT <u>LARHIR</u> THTGEKPFACDICGRKFA<br>RSDALTQHAQRCGGLR                                      | AAMAERPFQCRICMRNFSDRSALS <u>RHIR</u> THTGEK<br>PFACDICGRKFARNDDRKKHTKIHTGGQRPFQCRICMRNFS <u>TSGNLTRHIR</u> THTGEKPFACDICGRKFA<br>TSGSLTRHTKIHTGSQKPFQCRICMRNFSRSDVLS<br>EHIR <u>THTGEK</u> PFACDICGRKFAQSGN <u>LARHAQRC</u><br>GGLR |
| 15    | exon 2-2            | AAMAERPFQCRICMRNFSRSDSL <u>SAHIR</u> THTGEKPFACDICGRKFARSAA <u>LARHTKIHTGGQRPFQCRICMRNFSRSDNLSEHIR</u> THTGEKPFACDICGRKFAAS<br>KTRINHTKIHTGSQKPFQCRICMRKF <u>ADRSHLAR</u><br>HAQRCGLR  | AAMAERPFQCRICMRNFSRSDHLS <u>THIR</u> THTGEKPFACDICGRKFAQSGSLTRHTKIHTGGQRPFQCRICMRNFSRSDHLS <u>EHIR</u> THTGEKPFACDICGRKFAQ<br>NHHRINHTKIHTGSQKPFQCRICMRNFSTSGNLTR<br>HIR <u>THTGEK</u> PFACDICGRKF <u>ADRSALARHAQRC</u><br>GLR      |
| 16    | exon 2-2            | AAMAERPFQCRICMRNFSRSDSL <u>SAHIR</u> THTGEKPFACDICGRKFARSAA <u>LARHTKIHTGGQRPFQCRICMRNFSRSDNLSEHIR</u> THTGEKPFACDICGRKFAAS<br>KTRINHTKIHTGSQKPFQCRICMRKF <u>ADRSHLAR</u><br>HAQRCGGLR | AAMAERPFQCRICMRNFSRSDHLS <u>THIR</u> THTGEKPFACDICGRKFAQSGSLTRHTKIHTGGQRPFQCRICMRNFSRSDHLS <u>EHIR</u> THTGEKPFACDICGRKFAQ<br>NHHRINHTKIHTGSQKPFQCRICMRNFSTSGNLTR<br>HIR <u>THTGEK</u> PFACDICGRKF <u>ADRSALARHAQRC</u><br>GLR      |

\* DNA recognition helicies in each domain of the ZFN pair are underlined

**ZFN15 (TI events # 278, 417, 418, 419)**  
**[event # 418 = phytate content analysis; Fig 5 b-c-d -- # 419 = TI homozygote]**

**ZF domain left homodimerization sites**

| # | Loc  | Pos*        | Sequence                                | Region     | Coding? | Events   | Wild-type chromatids | Mutant chromatids |
|---|------|-------------|-----------------------------------------|------------|---------|----------|----------------------|-------------------|
| 1 | chr7 | 190,548,543 | ACGtTACaaGGGcACCTCCTCAAGTACCCAGtTAagGT  | AC199903.3 | Yes     | 418, 419 | 8/8                  | 0/8               |
| 2 | chr2 | 241,214,062 | ACctTAaCTGGGTACTTGAGGAGGTgCCcttGTaatGT  | AC197242.3 | Yes     | 418, 419 | 8/8                  | 0/8               |
|   | chr2 | 241,018,416 |                                         | AC194208.3 | Yes     |          |                      |                   |
| 3 | chr7 | 49,025,336  | TTCGATgCgTGGGTAATAGATTTATTACctAGaTcTaGG | AC212685.2 | No      | 418, 419 | 7/7                  | 0/7               |
|   | chr7 | 49,150,133  |                                         | AC198132.3 | No      |          |                      |                   |
| 4 | chr5 | 97,762,802  | TCagTAgCTGaGTAGCTGAGCGCTACgCgGGTgctGG   | AC212095.2 | No      | 418, 419 | 8/8                  | 0/8               |
| 5 | chr1 | 114,392,019 | AtatgACgTGGGTACTGTATAAGGTAgCCAGGgAgCGC  | AC190694.3 | No      | 418, 419 | ND <sup>o</sup>      | ND <sup>o</sup>   |

**ZF domain right homodimerization sites**

| # | Loc  | Pos*        | Sequence                                     | Region     | Coding? | Events   | Wild-type chromatids | Mutant chromatids |
|---|------|-------------|----------------------------------------------|------------|---------|----------|----------------------|-------------------|
| 1 | chr7 | 41,879,634  | AggGgACCCGACGCTCGAgCGGTGGTgAGCtTGGGGCAaGGC   | AC214430.2 | No      | 418, 419 | 7/7                  | 0/7               |
| 2 | chr6 | 202,077,821 | CCctTACCCGTCCAgCGAtCCAGCGGTgGgcTGTGGGcCttGGT | AC204876.2 | No      | 418, 419 | 8/8                  | 0/8               |
| 3 | chr7 | 41,888,298  | AggGgACgCGACGCTCGAgCGGTGGTgAGCtTGGGGCAaGGC   | AC214430.2 | Yes     | 418, 419 | 7/7                  | 0/7               |
| 4 | chr9 | 74,538,149  | CCCGaGCCtGACGtTCGcATACGGcCGAaAcgCGGGCAGGGA   | AC203748.3 | Yes     | 418, 419 | 8/8                  | 0/8               |
|   | chr9 | 74,303,084  |                                              | AC205255.3 | Yes     |          |                      |                   |
| 5 | chr4 | 235,580,893 | GagcaGCCCGTgCATCGAgGAGCTGTCGAGGGACGGtCAgGGA  | AC194903.3 | Yes     | 418, 419 | 5/5                  | 0/5               |

**ZF domain heterodimerization sites**

| # | Loc   | Pos*        | Sequence                                   | Region            | Coding? | Events             | Wild-type chromatids | Mutant chromatids |
|---|-------|-------------|--------------------------------------------|-------------------|---------|--------------------|----------------------|-------------------|
| 1 | chr2  | 4,503,501   | CCaAcAtCTGGGTgCCAATCATGTCTGATGGTGGGGTAtGGT | AC193307.3 (IPK2) | Yes     | 278, 417, 418, 419 | 15/15                | 0/15              |
| 2 | chr10 | 147,570,681 | GCCATgCCTGGGcACGAAGAGGTtGAGCcAGGGGTgCGGC   | AC198492.2        | Yes     | 418, 419           | 8/8                  | 0/8               |
|   | chr10 | 147,886,806 | GCcATgCCTGGGcACgAAGAGGTtGAGCcAGGGGTgCGGC   | AC199218.2        | Yes     |                    |                      |                   |
| 3 | chr2  | 37,321,203  | GCcATgCCTGGGcACgAAAAGGTtGAGCcAGGGGTgCGGC   | AC204299.2        | No      | 418, 419           | ND <sup>o</sup>      | ND <sup>o</sup>   |
| 4 | chr1  | 231,112,029 | CCGcTgCCTGGGTtGaACGTcGagCAGGGGTgAGGTAgGGG  | AC203826.4        | No      | 418, 419           | 7/7                  | 0/7               |
| 5 | chr10 | 49,474,665  | ACcATAgAteGGTAgATGTAGGGTCGAGAGAAgGtCACGGT  | AC197428.3        | No      | 418, 419           | 8/8                  | 0/8               |
|   | chr10 | 49,652,355  |                                            | AC206269.2        | No      |                    |                      |                   |

\* www.maizesequence.org Release 2a.50 (October, 2008)

<sup>o</sup> We could not get a specific PCR product for this locus

**Supplementary Table 2. Analysis of ZFN 15 action at potential off-target sites.**

A listing of the potential homodimerization and heterodimerization off-target sites for ZFN15 in the non-repetitive portion of the maize genome; the mismatches relative to the ZFN consensus sites are shown in lowercase and the potential binding sites are highlighted. Leaf gDNA was extracted from T0 regenerated plants and the sites were amplified by PCR followed by TOPO cloning and sequencing analysis of multiple independent clones.

## ZFN16 (TI event # 273)

## ZF domain left homodimerization sites

| # | Loc   | Pos*        | Sequence                                | Region     | Coding? | Event | Wild-type chromatids | Mutant chromatids |
|---|-------|-------------|-----------------------------------------|------------|---------|-------|----------------------|-------------------|
| 1 | chr1  | 206,282,173 | CCACCACCTGGGcACCTCCATGGTggCgAGGTGCCGT   | AC212040.1 | Yes     | 273   | 4/4                  | 0/4               |
| 2 | chr10 | 5,168,217   | CCAGaACCTGGGcACCCGAAACCTagCCCAGGTGACcA  | AC188612.3 | Yes     | 273   | 4/4                  | 0/4               |
| 3 | chr1  | 118,906,910 | TCCGCACCTGGGcAGGGGATGAGAcACCCA GcaGGGGC | AC195543.3 | Yes     | 273   | 4/4                  | 0/4               |
| 4 | chr6  | 58,313,525  | GCCAgCTGGGTACTTGTGACGTTACCcGGTGGAGA     | AC205041.2 | No      | 273   | 4/4                  | 0/4               |
|   | chr6  | 58,198,472  |                                         | AC205397.3 | No      |       |                      |                   |
|   | chr6  | 58,118,855  |                                         | AC205397.3 | No      |       |                      |                   |
| 5 | chr7  | 72,155,807  | GCCAgCTGGGTACTTGTGGC GTTACCcGGTGGAGA    | AC207566.2 | No      | 273   | 4/4                  | 0/4               |

## ZF domain right homodimerization sites

| # | Loc  | Pos*        | Sequence                                      | Region     | Coding? | Event | Wild-type chromatids | Mutant chromatids |
|---|------|-------------|-----------------------------------------------|------------|---------|-------|----------------------|-------------------|
| 1 | chr7 | 41,879,634  | AggGgACCCGACGCTCGAgCGGTGGTaGAGCtTGGGGCAaGGC   | AC214430.2 | No      | 273   | 4/4                  | 0/4               |
| 2 | chr6 | 202,077,821 | CCCtTACCCGTCCA gCGAtCCAGCGGTgGgcTGTGGGcCttGGT | AC204876.2 | No      | 273   | 4/4                  | 0/4               |
| 3 | chr6 | 8,595,095   | GCCGTGCaCGgaGCTCGcCCAGGAtTCGcGCGTaGGGTtCGGA   | AC200868.3 | No      | 273   | 4/4                  | 0/4               |
|   | chr6 | 8,378,531   |                                               | AC211622.3 | No      |       |                      |                   |
|   | chr6 | 8,712,818   |                                               | AC194149.3 | No      |       |                      |                   |
|   | chr8 | 99,043,796  |                                               | AC212370.3 | No      |       |                      |                   |
|   | chr8 | 99,311,115  |                                               | AC202068.2 | No      |       |                      |                   |
|   | chr3 | 199,367,460 |                                               | AC209909.2 | No      |       |                      |                   |
|   | chr3 | 199,194,688 |                                               | AC209909.2 | No      |       |                      |                   |
| 4 | chr7 | 41,888,298  | AggGgACgCGACGCTCGAgCGGTGGTaGAGCtTGGGGCAaGGC   | AC214430.2 | Yes     | 273   | 4/4                  | 0/4               |
| 5 | chr7 | 28,499,159  | GCCGcGCCaGTCTATacACGTCTGGTcGATTGcCGGGTtGaA    | AC194902.3 | No      | 273   | ND <sup>o</sup>      | ND <sup>o</sup>   |

## ZF domain heterodimerization sites

| # | Loc   | Pos*        | Sequence                                  | Region            | Coding? | Event | Wild-type chromatids | Mutant chromatids |
|---|-------|-------------|-------------------------------------------|-------------------|---------|-------|----------------------|-------------------|
| 1 | chr2  | 4,503,501   | CCaAcAtCTGGGTgCCAATCATGTCGATGGTGGGGTAtGGT | AC193307.3 (IPK2) | Yes     | 273   | 4/4                  | 0/4               |
| 2 | chr1  | 72,608,255  | CCTTtCCgGGGTgAAGGTGAGGTTCGAGCGTCGGGgACGaG | AC205071.2        | Yes     | 273   | 3/3                  | 0/3               |
| 3 | chr10 | 49,474,665  | ACeATAgTcGGTAGaTGTAGGTTCGAGAGAAgGtCACGGT  | AC197428.3        | No      | 273   | 4/4                  | 0/4               |
|   | chr10 | 49,652,355  |                                           | AC206269.2        | No      |       |                      |                   |
| 4 | chr9  | 42,980,450  | ACCacGCCctTCCATCGACGACGACCTACCCAcGcGCTGC  | AC216802.2        | No      | 273   | ND <sup>o</sup>      | ND <sup>o</sup>   |
| 5 | chr10 | 147,570,681 | GCCATgCCTGGGcACGAAGAGGTtGAGCcAGGGGTgCGGC  | AC198492.2        | Yes     | 273   | 4/4                  | 0/4               |
|   | chr10 | 147,886,806 | GCCATgCCTGGGcACGAAGAGGTtGAGCcAGGGGTgCGGC  | AC199218.2        | Yes     | 273   | 4/4                  | 0/4               |

\* www.maizesequence.org Release 2a.50 (October, 2008)

<sup>o</sup> We could not get a specific PCR product for this locus**Supplementary Table 3. Analysis of ZFN 16 action at potential off-target sites.**

A listing of the potential homodimerization and heterodimerization off-target sites for ZFN16 in the non-repetitive portion of the maize genome; the mismatches relative to the ZFN consensus sites are shown in lowercase and the potential binding sites are highlighted. Leaf gDNA was extracted from T0 regenerated plants and the sites were amplified by PCR followed by TOPO cloning and sequencing analysis of multiple independent clones.

## ZFN15

## ZF domain left homodimerization sites

| # | Loc  | Pos*        | Forward Primer 5' to 3'       | Reverse Primer 5' to 3'    |
|---|------|-------------|-------------------------------|----------------------------|
| 1 | chr7 | 190,548,543 | GCT TAC TGC GGT TTT GTT AAT G | CGA TAA ACC CGC CAA TTT TA |
| 2 | chr2 | 241,214,062 | ACGCTACATGGTCAGCGAATCAGGAAG   | AACGATCGATGACCGCTTCAAGG    |
|   | chr2 | 241,018,416 |                               |                            |
| 3 | chr7 | 49,025,336  | GCG AGA TTT TTA GTT CAG TCG   | TCA GCT CTT CAC TGT TTG TC |
|   | chr7 | 49,150,133  |                               |                            |
| 4 | chr5 | 97,762,802  | ATT AGT AGT CCG TAT TTG CTA C | TGG ATT CAA TTG CGC GGG CG |
| 5 | chr1 | 114,392,019 |                               |                            |

## ZF domain right homodimerization sites

| # | Loc  | Pos*        | Forward Primer 5' to 3'       | Reverse Primer 5' to 3'    |
|---|------|-------------|-------------------------------|----------------------------|
| 1 | chr7 | 41,879,634  | GCA CCG AGG AAG CAA GGA TG    | GAT CTC CGG CTG ATA TTT AT |
| 2 | chr6 | 202,077,821 | CAT GAG CTT TAA GAC TAA CAA C | CAA GCT CAA AGC CCA ATG CG |
| 3 | chr7 | 41,888,298  | CAT CAC CAG CGA GCT CCA AG    | CAG CTC CCT CGA AAA ATC TC |
| 4 | chr9 | 74,538,149  | CAC GTC CTC TCT CTC CCT CAT C | GCG AGC TAA CCG TAG AAC GG |
|   | chr9 | 74,303,084  |                               |                            |
| 5 | chr4 | 235,580,893 | GCG AGA AAG CTG GCC CGC AG    | CCA AGA TGG CGC GCA CGG AG |

## ZF domain heterodimerization sites

| # | Loc   | Pos*        | Forward Primer 5' to 3'       | Reverse Primer 5' to 3'     |
|---|-------|-------------|-------------------------------|-----------------------------|
| 1 | chr2  | 4,503,501   | TTGGAGGAAGCATTGCTTCACTTTG     | GTCGCAATTCTCCAATTTCTTC      |
| 2 | chr10 | 147,570,681 | AGGGACCCCTCTTTATCTACCA        | GGGCAGCTGAGCTATCTGAG        |
|   | chr10 | 147,886,806 |                               |                             |
| 3 | chr2  | 37,321,203  |                               |                             |
| 4 | chr1  | 231,112,029 | ACC GTC CGA TCT TCA ATC AGT G | ACG CCC CAA TTC AAG GTG AG  |
| 5 | chr10 | 49,474,665  | CTG CAC CAA TCG CTC GCT AG    | GGG TAT TGG TGT GTC CTG GCC |
|   | chr10 | 49,652,355  |                               |                             |

## ZFN16

## ZF domain left homodimerization sites

| # | Loc   | Pos*        | Forward Primer 5' to 3'     | Reverse Primer 5' to 3'        |
|---|-------|-------------|-----------------------------|--------------------------------|
| 1 | chr1  | 206,282,173 | TGAGAAAGCTTTAAACATAACAACCGC | GCTACTTAGCTGTAAAAATTAAGTATGAGC |
| 2 | chr10 | 5,168,217   | TCGCTGTCGTTTGTAAATGCGGC     | GGTGTATCCCGGAGCTTTGTGC         |
| 3 | chr1  | 118,906,910 | CAGCAGGGGAATGCAGTGGGAATC    | TCAGTCTCGTCGGACAGCCCTGC        |
| 4 | chr6  | 58,313,525  | GAATCTCCGGCGCAACAGAAATC     | TCCCAGCTATTCTAACCCGAGC         |
|   | chr6  | 58,198,472  |                             |                                |
|   | chr6  | 58,118,855  |                             |                                |
| 5 | chr7  | 72,155,807  | CGTAGAAATCTCCGGCGCAACAG     | TCCCAGCTATTCTAACCCGAGC         |

## ZF domain right homodimerization sites

| # | Loc  | Pos*        | Forward Primer 5' to 3'       | Reverse Primer 5' to 3'    |
|---|------|-------------|-------------------------------|----------------------------|
| 1 | chr7 | 41,879,634  | GCA CCG AGG AAG CAA GGA TG    | GAT CTC CGG CTG ATA TTT AT |
| 2 | chr6 | 202,077,821 | CAT GAG CTT TAA GAC TAA CAA C | CAA GCT CAA AGC CCA ATG CG |
| 3 | chr6 | 8,595,095   | ACTTACCTGGCCGACAGTGGAAATC     | TCTCGGCAATACGGCAAGAAG      |
|   | chr6 | 8,378,531   |                               |                            |
|   | chr6 | 8,712,818   |                               |                            |
|   | chr8 | 99,043,796  |                               |                            |
|   | chr8 | 99,311,115  |                               |                            |
|   | chr3 | 199,367,460 |                               |                            |
|   | chr3 | 199,194,688 |                               |                            |
| 4 | chr7 | 41,888,298  | CAT CAC CAG CGA GCT CCA AG    | CAG CTC CCT CGA AAA ATC TC |
| 5 | chr7 | 28,499,159  |                               |                            |

## ZF domain heterodimerization sites

| # | Loc   | Pos*        | Forward Primer 5' to 3'    | Reverse Primer 5' to 3'     |
|---|-------|-------------|----------------------------|-----------------------------|
| 1 | chr2  | 4,503,501   | TTGGAGGAAGCATTGCTTCACTTTG  | GTCGCAATTCTCCAATTTCTTC      |
| 2 | chr1  | 72,608,255  | ACGACCTCGATGCCGTTGAGAAAG   | TCCACTTCTACCCGCCAACTAC      |
| 3 | chr10 | 49,474,665  | CTG CAC CAA TCG CTC GCT AG | GGG TAT TGG TGT GTC CTG GCC |
|   | chr10 | 49,652,355  |                            |                             |
| 4 | chr9  | 42,980,450  |                            |                             |
| 5 | chr10 | 147,570,681 | AGGGACCCCTCTTTATCTACCA     | GGGCAGCTGAGCTATCTGAG        |
|   | chr10 | 147,886,806 |                            |                             |

\* www.maizesequence.org Release 2a.50 (October, 2008)

## Supplementary Table 4. Primer sequences used to genotype potential off-target sites for ZFN action.

Supplementary Table 5. Amino Acid Sequences of *Zp15* Zinc-Finger Binding Domains

| ZFN # | Target Position | ZF Domain Left*                                                                                                                                                                                                                                                                                                                                                                                                                                                                                                                                                                                                                                                                                                                                                          | ZF Domain Right*                                                                                                                                                                                                                                                                                                                                                                                                                                                                                                                                                                                                                                                                                                                                               |
|-------|-----------------|--------------------------------------------------------------------------------------------------------------------------------------------------------------------------------------------------------------------------------------------------------------------------------------------------------------------------------------------------------------------------------------------------------------------------------------------------------------------------------------------------------------------------------------------------------------------------------------------------------------------------------------------------------------------------------------------------------------------------------------------------------------------------|----------------------------------------------------------------------------------------------------------------------------------------------------------------------------------------------------------------------------------------------------------------------------------------------------------------------------------------------------------------------------------------------------------------------------------------------------------------------------------------------------------------------------------------------------------------------------------------------------------------------------------------------------------------------------------------------------------------------------------------------------------------|
| 24    | exon 2-2        | <u>A</u> A <u>M</u> A <u>E</u> R <u>P</u> F <u>Q</u> <u>C</u> R <u>I</u> C <u>M</u> R <u>N</u> F <u>S</u> <u>R</u> <u>S</u> <u>D</u> <u>H</u> <u>L</u><br><u>S</u> R <u>H</u> I <u>R</u> T <u>H</u> T <u>G</u> E <u>K</u> <u>P</u> F <u>A</u> C <u>D</u> I <u>C</u> <u>G</u> R <u>K</u> F <u>A</u> R<br><u>S</u> D <u>N</u> L <u>T</u> T <u>H</u> T <u>K</u> I <u>H</u> T <u>G</u> S <u>Q</u> <u>K</u> <u>P</u> F <u>Q</u> <u>C</u> R <u>I</u> C <u>M</u><br>R <u>N</u> F <u>S</u> <u>R</u> <u>S</u> <u>D</u> <u>D</u> L <u>T</u> R <u>H</u> I <u>R</u> T <u>H</u> T <u>G</u> E <u>K</u> <u>P</u> F <u>A</u> C<br>D <u>I</u> C <u>G</u> R <u>K</u> F <u>A</u> D <u>S</u> S <u>D</u> R <u>K</u> <u>K</u> H <u>A</u> <u>Q</u> <u>R</u> <u>C</u> <u>G</u> <u>L</u> <u>R</u> | A <u>A</u> M <u>A</u> E <u>R</u> <u>P</u> F <u>Q</u> <u>C</u> R <u>I</u> C <u>M</u> R <u>N</u> F <u>S</u> <u>Q</u> <u>S</u> <u>G</u> <u>D</u> L <u>T</u> R <u>H</u> I <u>R</u> T <u>H</u> T <u>G</u><br>E <u>K</u> <u>P</u> F <u>A</u> C <u>D</u> I <u>C</u> <u>G</u> R <u>K</u> F <u>A</u> D <u>R</u> <u>S</u> <u>D</u> L <u>S</u> R <u>H</u> T <u>K</u> I <u>H</u> T <u>G</u> S <u>Q</u> <u>K</u> <u>P</u> F<br>Q <u>C</u> R <u>I</u> C <u>M</u> R <u>N</u> F <u>S</u> <u>Q</u> <u>S</u> <u>G</u> <u>D</u> L <u>T</u> R <u>H</u> I <u>R</u> T <u>H</u> T <u>G</u> E <u>K</u> <u>P</u> F <u>A</u> C <u>D</u> I <u>C</u><br>G <u>R</u> <u>K</u> F <u>A</u> R <u>S</u> D <u>N</u> L <u>T</u> R <u>H</u> A <u>Q</u> <u>R</u> <u>C</u> <u>G</u> <u>L</u> <u>R</u> |
| 25    | exon 2-10       | A <u>A</u> M <u>A</u> E <u>R</u> <u>P</u> F <u>Q</u> <u>C</u> R <u>I</u> C <u>M</u> R <u>N</u> F <u>S</u> <u>D</u> R <u>S</u> H <u>L</u><br>T <u>R</u> H <u>I</u> R <u>T</u> H <u>T</u> G <u>E</u> <u>K</u> <u>P</u> F <u>A</u> C <u>D</u> I <u>C</u> <u>G</u> R <u>K</u> F <u>A</u> R<br><u>S</u> D <u>N</u> L <u>T</u> T <u>H</u> T <u>K</u> I <u>H</u> T <u>G</u> S <u>Q</u> <u>K</u> <u>P</u> F <u>Q</u> <u>C</u> R <u>I</u> C <u>M</u><br>R <u>N</u> F <u>S</u> <u>R</u> <u>S</u> <u>D</u> <u>N</u> L <u>S</u> T <u>H</u> I <u>R</u> T <u>H</u> T <u>G</u> E <u>K</u> <u>P</u> F <u>A</u> C<br>D <u>I</u> C <u>G</u> R <u>K</u> F <u>A</u> R <u>S</u> A <u>D</u> L <u>S</u> R <u>H</u> A <u>Q</u> <u>R</u> <u>C</u> <u>G</u> <u>L</u> <u>R</u>                      | A <u>A</u> M <u>A</u> E <u>R</u> <u>P</u> F <u>Q</u> <u>C</u> R <u>I</u> C <u>M</u> R <u>N</u> F <u>S</u> <u>R</u> <u>S</u> <u>D</u> <u>N</u> L <u>A</u> R <u>H</u> I <u>R</u> T <u>H</u> T <u>G</u><br>E <u>K</u> <u>P</u> F <u>A</u> C <u>D</u> I <u>C</u> <u>G</u> R <u>K</u> F <u>A</u> D <u>R</u> <u>S</u> <u>D</u> L <u>S</u> R <u>H</u> T <u>K</u> I <u>H</u> T <u>G</u> S <u>Q</u> <u>K</u> <u>P</u> F<br>Q <u>C</u> R <u>I</u> C <u>M</u> R <u>N</u> F <u>S</u> <u>Q</u> <u>S</u> <u>G</u> <u>S</u> L <u>T</u> R <u>H</u> I <u>R</u> T <u>H</u> T <u>G</u> E <u>K</u> <u>P</u> F <u>A</u> C <u>D</u> I <u>C</u><br>G <u>R</u> <u>K</u> F <u>A</u> R <u>S</u> D <u>H</u> L <u>T</u> T <u>H</u> A <u>Q</u> <u>R</u> <u>C</u> <u>G</u> <u>L</u> <u>R</u> |

\* DNA recognition helicies in each domain of the ZFN pair are underlined

**Supplementary Table 6. ZFN engineering and testing statistics**

| Gene target | ZFNs generated | ZFN pairs | Pairs tested in proxy systems | Tested in maize | Active in editing at endogenous locus |
|-------------|----------------|-----------|-------------------------------|-----------------|---------------------------------------|
| <i>IPK1</i> | 66             | 63        | 38                            | 4               | 4                                     |
| <i>Zp15</i> | 41             | 33        | 17                            | 2               | 2                                     |

Note 1. ZFN pairs can be formed by mix-and-matching several ZFNs that recognize the same site and for that reason the number of ZFN pairs is greater than the number of ZFNs generated / 2.

Note 2. Of all the ZFNs generated, not all bind DNA as gauged by an ELISA assay; only pairs in which both ZFNs bind DNA are tested in proxy systems.

## Supplementary Discussion

### *Design of ZFNs to discriminate between the ZmIPK paralogs: a structural-biology based rationale.*

In general, designing zinc finger proteins to robustly discriminate against a single mismatch can be challenging. In the case of *ZmIPK1* versus *ZmIPK2*, which contained several SNPs in the regions targeted (Supp. Fig. 1), we generated many potential ZFN pairs that bound at least one of the relevant mismatches (Supp. Table 6) and we were able to choose designs that we felt had the greatest chance of discriminating against the unwanted sequence.

In the case of ZFN15-L and ZFN16-L we felt the recognition helix pair RSAALARRSDNLSE had a good chance of discriminating between the hexamer 3'-GTGGAC-5' in IPK1 and the hexamer 3'-GTAGAC-5' in IPK2. This situation seemed analogous to fingers 1 and 2 of Zif268 which use RSDELTR RSDHLTT to recognize 3'-GCGGGT-5'. In the 1.6 Å Zif 268 structure (Elrod-Erickson et al., *Structure* 1996), the guanine analogous to our SNP is bound by Arg24 (at position +6 of RSDELTR) via two hydrogen bonds and the cytosine base-paired to this guanine is bound by Asp48 (at position +2 of RSDHLTT). These contacts likely explain the extremely high specificity for a guanine in this position observed in SELEX experiments with Zif268 (Wolfe et al., *J Mol Biol* 1999 and Miller et al., *J Mol Biol* 2001). Our SELEX experiment with ZFN15-L yielded 63 usable sequences; at the position of the SNP we found 60 guanines and 3 cytosines. A similar SELEX experiment with ZFN16-L yielded 39 usable sequences; at the position of the SNP we found 37 guanines and 2 cytosines. These results are consistent with a ZFN pair that can discriminate between a guanine and an adenine at this position.

For ZFN12-R, we felt that RNDDRKK had a good chance of discriminating between 3'-GCT-5' in IPK1 and 3'-TCT-5' in IPK2. Presumably the Arg at position -1 of this helix recognizes the guanine in 3'-GCT-5' in roughly the same way that Arg18, Arg46 and Arg74 of Zif268 recognize the relevant guanines in 3'-GCGGGTGCG-5'. Based on SELEX experiments with Zif268 (Wolfe et al., *J Mol Biol* 1999) this interaction should result in a strong preference for a guanine.

*Theoretical Calculation of ZFN density needed to effectively target all known genes in the maize genome.*

The most recent release of the maize genome (release 3a.50; Dec. 2008, <http://www.maizesequence.org>) indicates that the genome consists of 2,778.9 Mb of DNA, comprising 59,052 genes of average length equal to 2,605 base pairs. Our current ZFN design platform uses a large number of interchangeable 1-finger and 2-finger subunits that are mixed and matched to generate individual 4-finger, 5-finger and 6-finger ZFNs (use of ZFNs with longer recognition sequences yields, in our hands, more effective ZFNs, and, furthermore, allows greater specificity in binding and action). The total number of unique proteins we can build with our current platform is extremely large ( $\sim 2 \times 10^{10}$ ), but some of these subunit-combinations will target the same DNA sequence. When we adjust the calculations to address that fact and restricting ourselves to the best-characterized modules in our archive, our current archive enables targeting of approximately 32 unique sites per kilobase of random DNA sequence. Based on the average maize gene having a coding sequence of approximately 2,600 bp, we are currently able to design ZFNs to target approximately 83 unique locations per gene. Assuming at least one of these designs per gene is effective, in theory we should be able to modify the vast majority of genes in the maize genome with the current archive.
